# Supplementary material
Source: HighWire-hosted journal article supplement (https://bmjopen.bmj.com/content/14/1/e077023)
Supplement: inline-supplementary-material-3 [file inline-supplementary-material-3.pdf]

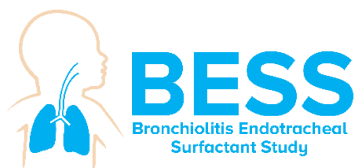

BESS Study team  
IPHS  
Block B  
1<sup>st</sup> Floor Waterhouse Building  
Liverpool L69 3GL

## BESS Site Staff Questionnaire

The aim of this short questionnaire is to find out how well you think BESS has been going at your site. This includes what you think is working well and perhaps what isn't working so well. We will use these findings, alongside data collected from parents to inform season two of BESS.

**Please note that by returning this survey you are giving permission for your responses to be included in the BESS trial. All information will be anonymised and stored securely in compliance with the Data Protection Act 1998.**

### Background information

1. Please identify your hospital (ADD list)
2. What is your current role at this hospital?  
  
Doctor / nurse / Other (please state) \_\_\_\_\_
3. How many years' experience do you have in recruiting to paediatric clinical trials?  
  
\_\_\_\_\_ years
4. Are you involved in clinical care of children?  
  
Yes / No
5. How have you been involved in the BESS study (please tick all that apply)  
  
☐ Screening patients  
☐ Randomisation  
☐ Consenting  
☐ Involved in the clinical care of BESS participants  
☐ Other (please state) \_\_\_\_\_

### Training

6. Who provided your BESS training (please tick all that apply)

Trial team (e.g. including BESS trial coordinator)

Member of your site team

Other (please state) \_\_\_\_\_

7. Overall how would you rate the BESS site training **from the trial team**?

Excellent/ Good/ Fair/ Poor / Not applicable (did not attend)

8. Overall how would you rate the BESS training **from your site team**?

Excellent/ Good/ Fair/ Poor / Not applicable (did not attend)

9. Do you think the BESS site training could be improved? Yes/No

If yes, how? \_\_\_\_\_

\_\_\_\_\_

### Process

10. Do you think the screening process could be improved? (Please circle one answer)

Yes / No

If yes, please elaborate:

\_\_\_\_\_  
\_\_\_\_\_

11. Do you think the randomisation process could be improved?

Yes / No

If yes, please elaborate:

\_\_\_\_\_  
\_\_\_\_\_

12. Have you experienced any difficulties in adhering to the protocol?

Yes / No

If yes, please elaborate:

\_\_\_\_\_  
\_\_\_\_\_

13. How acceptable did you find administering the intervention (surfactant) to patients?

Very acceptable / acceptable / not acceptable / very unacceptable / Not applicable

14. How acceptable did you find administering the placebo (sham) to patients?

Very acceptable / acceptable / not acceptable / very unacceptable / Not applicable

### Consent and comments

15. How acceptable did you find seeking informed consent before randomisation in BESS?

Very acceptable / Acceptable / Not acceptable / Very unacceptable / Not applicable

Please explain your answer:

---

---

16. How have parents responded to the BESS consent discussion?

Very positively/ Positively/ Negatively/ Very negatively/ Not applicable.

Please explain your answer \_\_\_\_\_

---

---

17. Did you find the case report form easy to use?

Yes / No/Not applicable

If No, Please provide and suggestions for improving the case report form

---

---

18. Did you find the consent form easy to use?

Yes / No/Not applicable

If No, Please provide and suggestions for improving the consent form

---

---

19. Please use this space to tell us anything you think is important for us to know to inform season 2 in BESS:

**Thank you for taking the time to complete this questionnaire.**
