# Supplementary material
Source: HighWire-hosted journal article supplement (https://bmjopen.bmj.com/content/14/1/e077023)
Supplement: inline-supplementary-material-6 [file inline-supplementary-material-6.pdf]

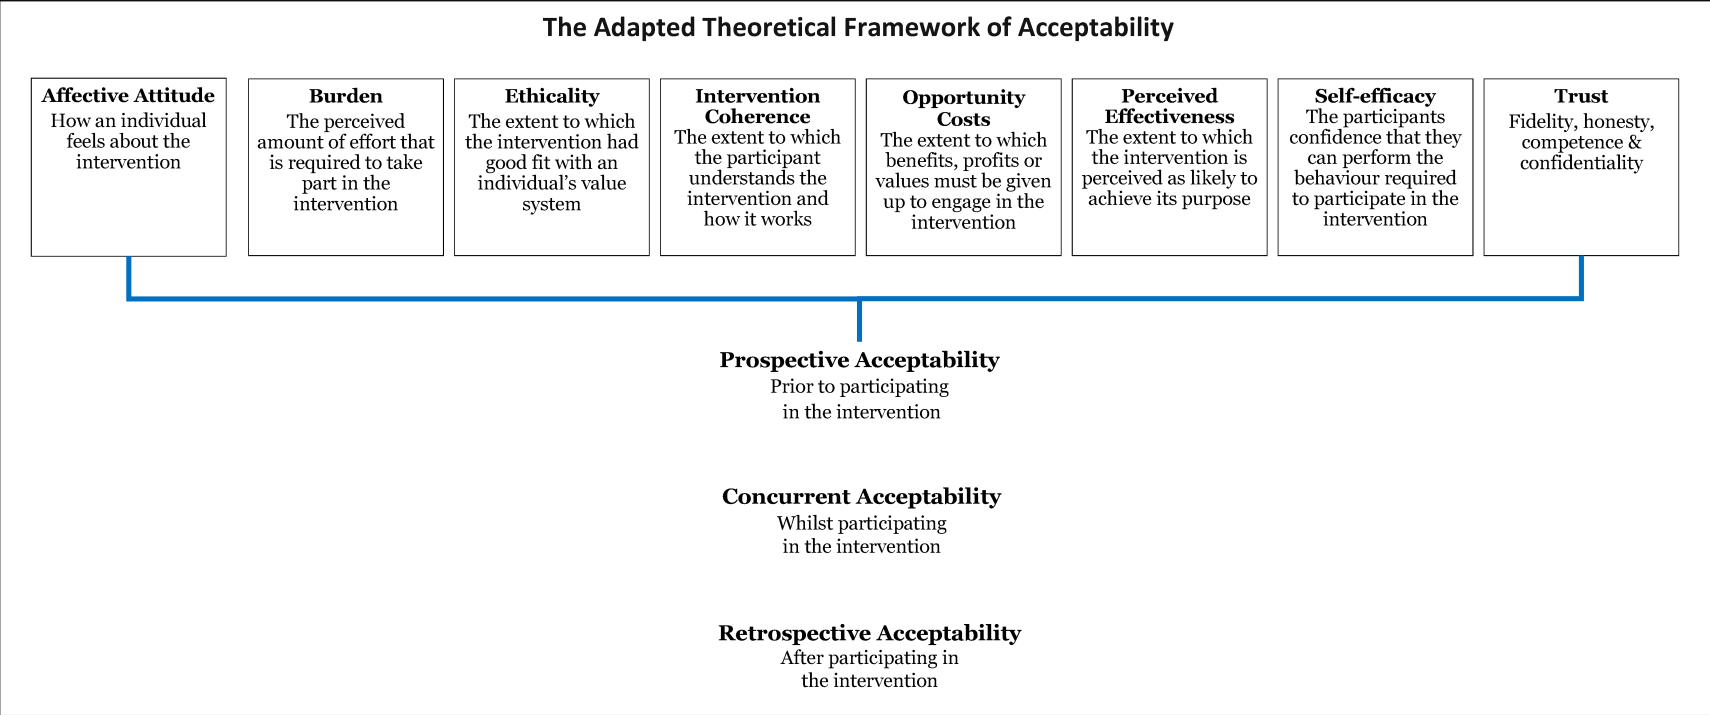

Deja E, Peters MJ, Khan I, Mouncey PR, Agbeko R, Fenn B, et al (2021). Establishing and augmenting views on the acceptability of a paediatric critical care randomised controlled trial (the FEVER trial): a mixed methods study. *BMJ Open*. 11(3):e041952.
